# Supplementary material
Source: PubMed Central journal article supplement (PMC2956011)
Supplement: hhe0069-0091-s01.pdf [file hhe0069-0091-s01.pdf]

## Sibpair QTL Power

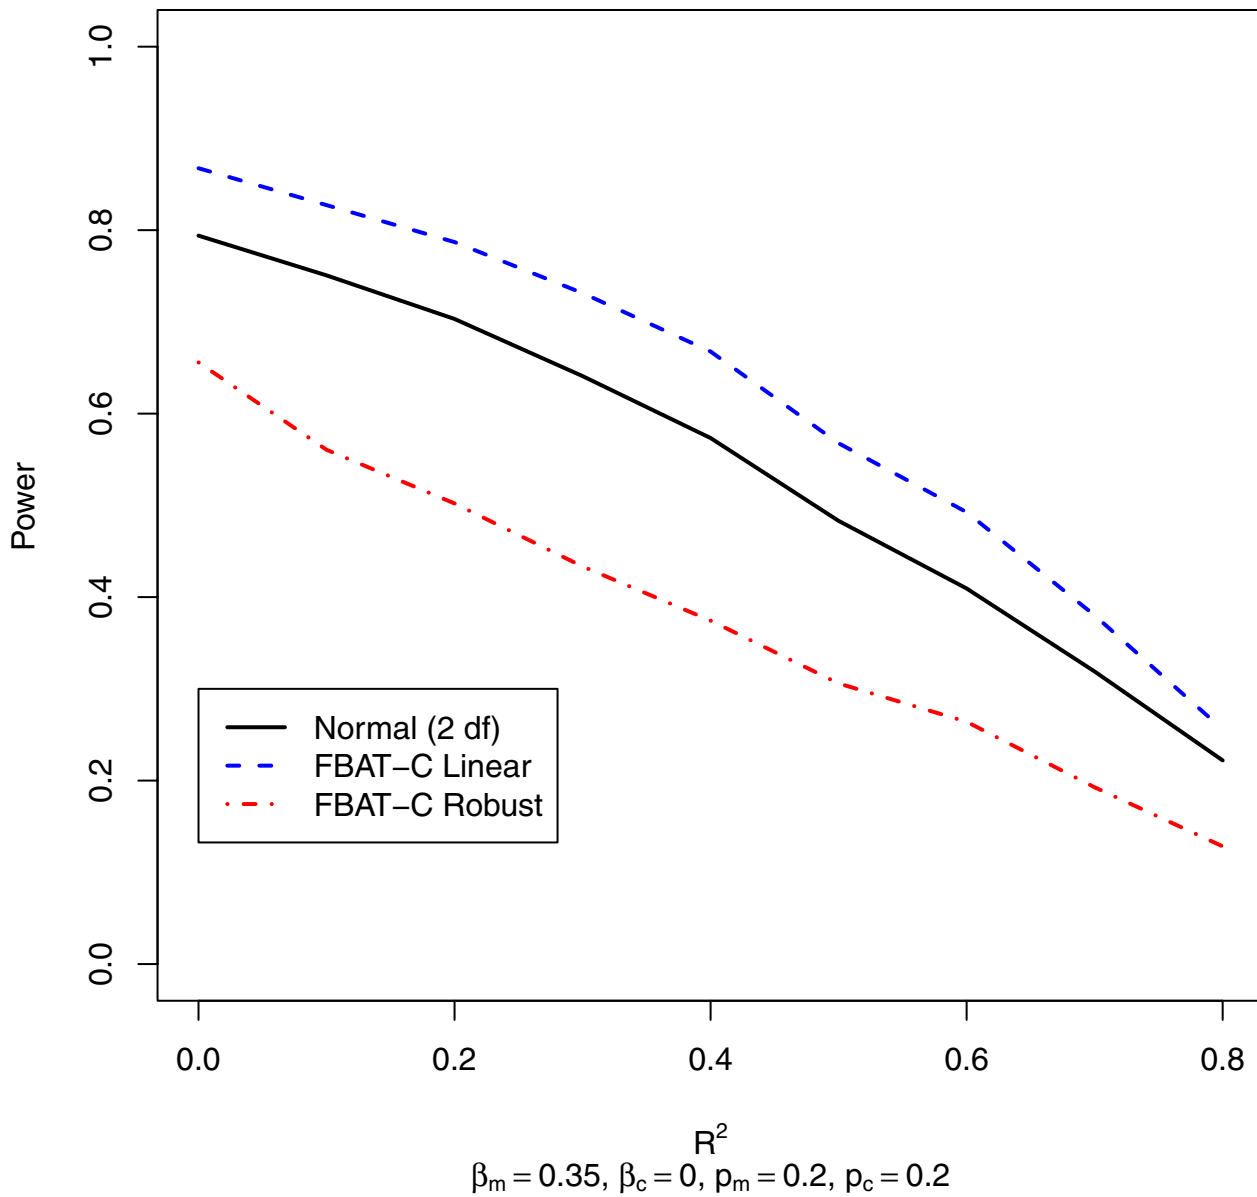

Figure VII: Power for discordant sibpairs of the test of  $X_m$  conditional on  $X_c$  for a continuous trait. Results are only shown for  $R^2$  up to 0.8, as the normal model is unstable for higher values.

## Sibpair QTL Validity with Population Stratification

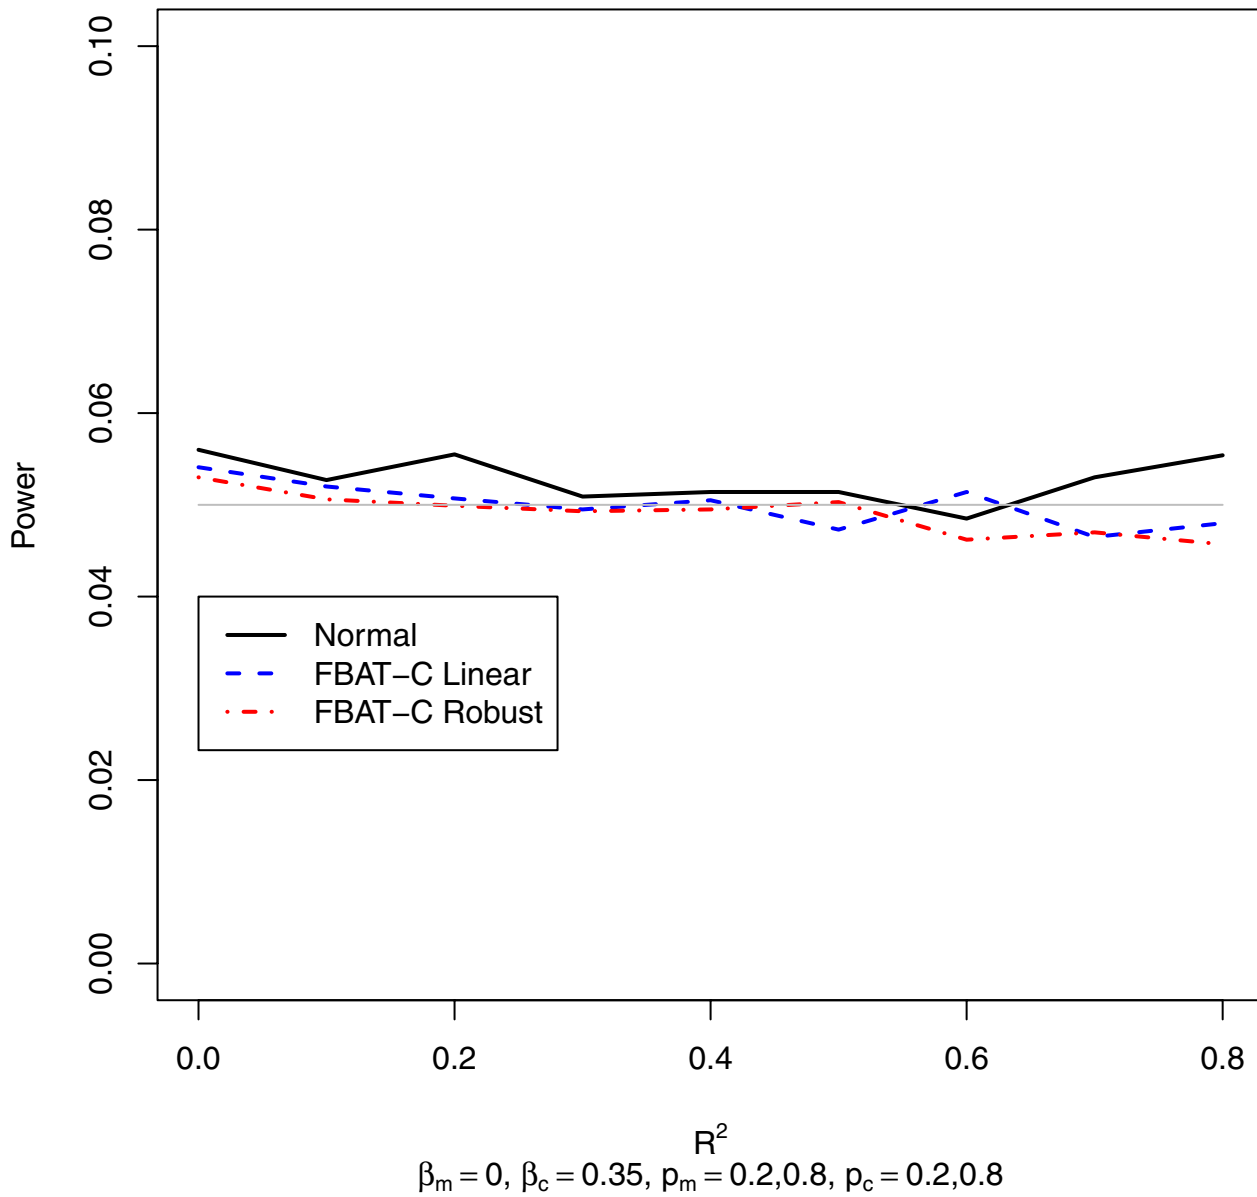

Figure VIII: Empirical type I error rate for discordant sibpairs under population substructure. Results are only shown for  $R^2$  up to 0.8, as the normal model is unstable for higher values.

| $\beta_0$ | $e^{\beta_m}$ | $e^{\beta_c}$ | $K$   | $R^2$ | FBAT-C Log-Linear | FBAT-C Robust |        |
|-----------|---------------|---------------|-------|-------|-------------------|---------------|--------|
| -2        | 1             | 1.5           | 0.16  | 0     | 0.0518            | 0.0516        |        |
|           |               |               |       | 0.2   | 0.0482            | 0.0497        |        |
|           |               |               |       | 0.5   | 0.0398            | 0.0480        |        |
|           |               |               |       | 0.8   | 0.0247            | 0.0523        |        |
|           | 3             | 0.27          | 0.27  | 0     | 0.0503            | 0.0499        |        |
|           |               |               |       | 0.2   | 0.0480            | 0.0497        |        |
|           |               |               |       | 0.5   | 0.0457            | 0.0538        |        |
|           |               |               |       | 0.8   | 0.0333            | 0.0517        |        |
|           | -4            | 1.5           | 0.022 | 0.022 | 0                 | 0.0514        | 0.0518 |
|           |               |               |       |       | 0.2               | 0.0479        | 0.0500 |
|           |               |               |       |       | 0.5               | 0.0425        | 0.0502 |
|           |               |               |       |       | 0.8               | 0.0244        | 0.0519 |
| 3         |               | 0.035         | 0.035 | 0     | 0.0510            | 0.0519        |        |
|           |               |               |       | 0.2   | 0.0518            | 0.0505        |        |
|           |               |               |       | 0.5   | 0.0462            | 0.0520        |        |
|           |               |               |       | 0.8   | 0.0394            | 0.0555        |        |

Table VI: FBAT-C validity results for model misspecification under a logistic model, with empirical type I error rate 0.05. Trios were simulated with the allele frequency of all markers 0.2, and the pairwise  $R^2$  between each of the markers and the population prevalence  $\alpha$  is as specified in the table.
